# Supplementary material for: Assessment of dispersal and population structure of Norway rats (Rattus norvegicus) in a seaport setting
Source: Springer Nature journal article supplement (doi:10.1007/s11252-021-01171-x), 2021-10-06

# Assessment of dispersal and population structure of Norway rats (*Rattus norvegicus*) in a seaport setting

Fernanda Gatto-Almeida<sup>1\*</sup>; Amanda de Araújo Soares<sup>1</sup>; Tiago Marafija Degrandi<sup>1</sup>; Liliani Marília Tiepolo<sup>2</sup>; Florian Pichlmüller<sup>3,4 \*\*</sup>; Iris Hass<sup>1\*\*</sup>

<sup>1</sup> Department of Genetics, Universidade Federal do Paraná, Private Bag 19071, Curitiba, PR, 81531-990, Brazil.

<sup>2</sup> Laboratory of Biodiversity and Conservation, Universidade Federal do Paraná, Matinhos, Brazil.

<sup>3</sup> School of Biological Sciences, University of Auckland, Private Bag 92019, Auckland 1142, New Zealand

<sup>4</sup> School of Biomedical Sciences, University of Otago, Dunedin 9054, New Zealand

\* Corresponding author email address: fgattoalmeida@ymail.com

## Online Resource 1 - Genetic assignment for individuals from Area 2, Area 3 and Port to reference populations Area 2 and Area 3

Log<sub>10</sub> genotype probability for population Area2

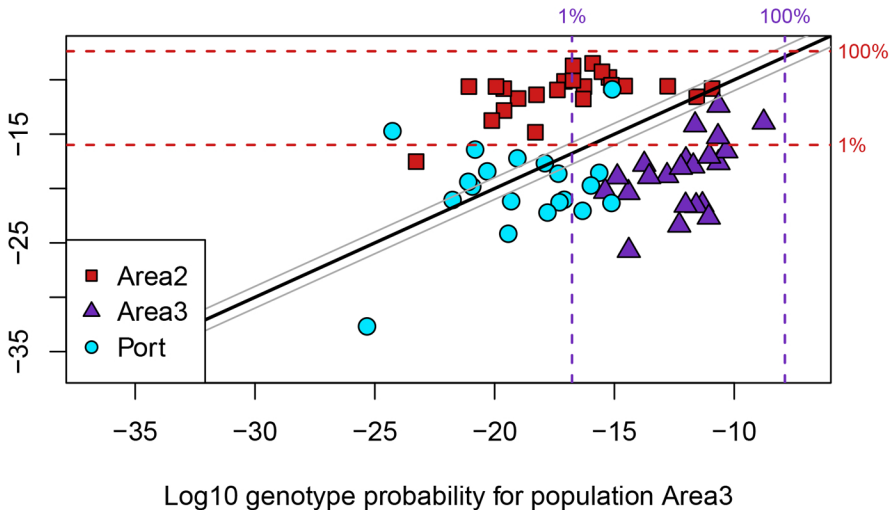

Supplement: MOESM1 [file 19735598]
